# Supplementary material for: Transformation and dehydration kinetics of methylene blue hydrates detected by terahertz time-domain spectroscopy
Source: Royal Society of Chemistry journal article supplement (doi:10.1039/c7ra07118c), 2017-01-01
Supplement: c7ra07118c1.pdf [file c7ra07118c1.pdf]

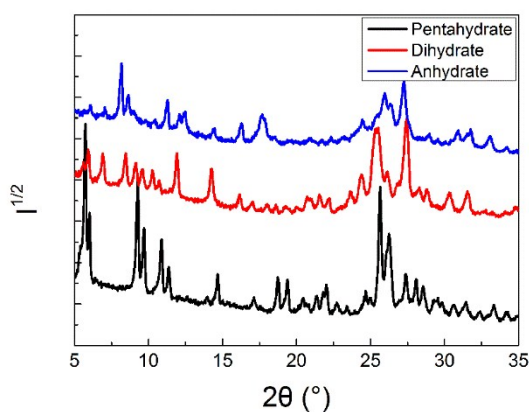

Fig. S1. XRPD patterns of the MB pentahydrate, dihydrate and anhydrate, measured with Cu K<sub>α</sub> radiation.

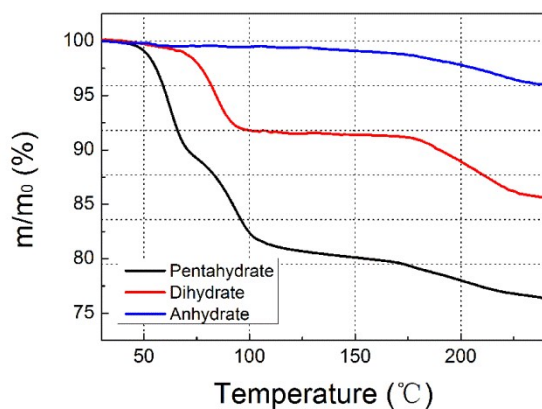

Fig. S2. TGA traces of MB pentahydrate, dihydrate and anhydrate.
